# Supplementary material for: A high-performance WS 2 /ZnO QD heterojunction photodetector with charge and energy transfer
Source: Royal Society of Chemistry journal article supplement (doi:10.1039/d4tc03659j), 2024-01-01
Supplement: d4tc03659j1.pdf [file d4tc03659j1.pdf]

# High-performance WS<sub>2</sub>/ZnO QDs heterojunction photodetector with charge and energy transfer

Yanjie Zheng,<sup>a</sup> Zhe Xu,<sup>b</sup> Kaixi Shi,<sup>\*a</sup> Jinhua Li,<sup>\*a</sup> Xuan Fang,<sup>c</sup> Zhenfeng Jiang,<sup>a</sup>  
Xueying Chu<sup>a</sup>

- a. *Nanophotonics and Biophotonics Key Laboratory of Jilin Province, School of Physics, Changchun University of Science and Technology, Changchun, Jilin 130022, People's Republic of China*
- b. *Changchun High-tech Industrial Development Zone, Shangde Academy of Jilin University, Changchun, Jilin 130000, People's Republic of China*
- c. *State Key Laboratory of High Power Semiconductor Laser, School of Science, Changchun University of Science and Technology, Changchun, Jilin 130022, People's Republic of China*

E-mail: [shikaixi@cust.edu.cn](mailto:shikaixi@cust.edu.cn), [lijh@cust.edu.cn](mailto:lijh@cust.edu.cn)

## Supporting Information

### 1. Preparation process and optical characterization of ZnO QDs.

Figure S1a shows the synthesis steps of zinc oxide quantum dots with oxygen interstitials. Figures S1b and c show the absorption and luminescence spectra of ZnO QDs at different concentrations, respectively. At a concentration of 18 mmol/L, the luminescence intensity of ZnO QDs is the strongest. This is attributed to the appropriate concentration of QDs suppressing their aggregation. Strong luminescence will generate a larger spectral overlap with the absorption of WS<sub>2</sub>, which facilitates dipole-dipole interactions and creates conditions for non-radiative energy transfer. Next, the bandgap of ZnO QDs was calculated by the following equation:

$$(\alpha \cdot hv)^2 = B \cdot (hv - E_g)$$

where  $\alpha$  is the absorption coefficient,  $h$  is the Planck's constant,  $\nu$  is the frequency of the incident light, and  $B$  is a constant. As shown in Figure S1d, the bandgap of ZnO QDs was about 3.34 eV.

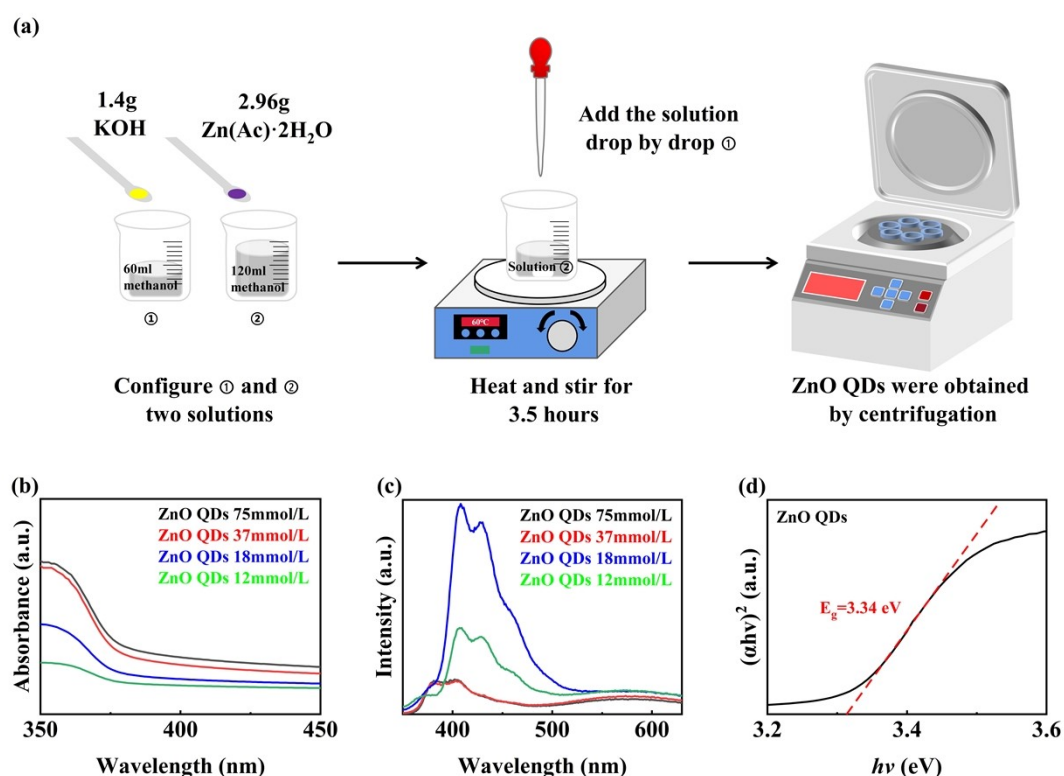

Figure S1. (a) Synthesis steps of ZnO QDs using the sol-gel method. Absorption spectra (b) and luminescence spectra (c) of ZnO QDs at different concentrations. (d) Bandgap of 18 mmol/L ZnO QDs.

## 2. The UV photoresponse of the WS<sub>2</sub> and WS<sub>2</sub>/ZnO QDs devices under 325 nm laser irradiation.

To demonstrate the broad spectral response of WS<sub>2</sub>/ZnO heterojunction photodetector, the UV photoresponse of the device was tested under 325 nm laser irradiation. As shown in the Figure S2a-b, the WS<sub>2</sub> device and the WS<sub>2</sub>/ZnO device exhibit UV photoresponse. As shown in the Figure S2c-d, the WS<sub>2</sub>/ZnO device exhibits enhanced UV photoresponse under 325 nm laser irradiation with different optical power densities. As a result, a UV-visible photodetector based WS<sub>2</sub>/ZnO heterojunction was achieved.

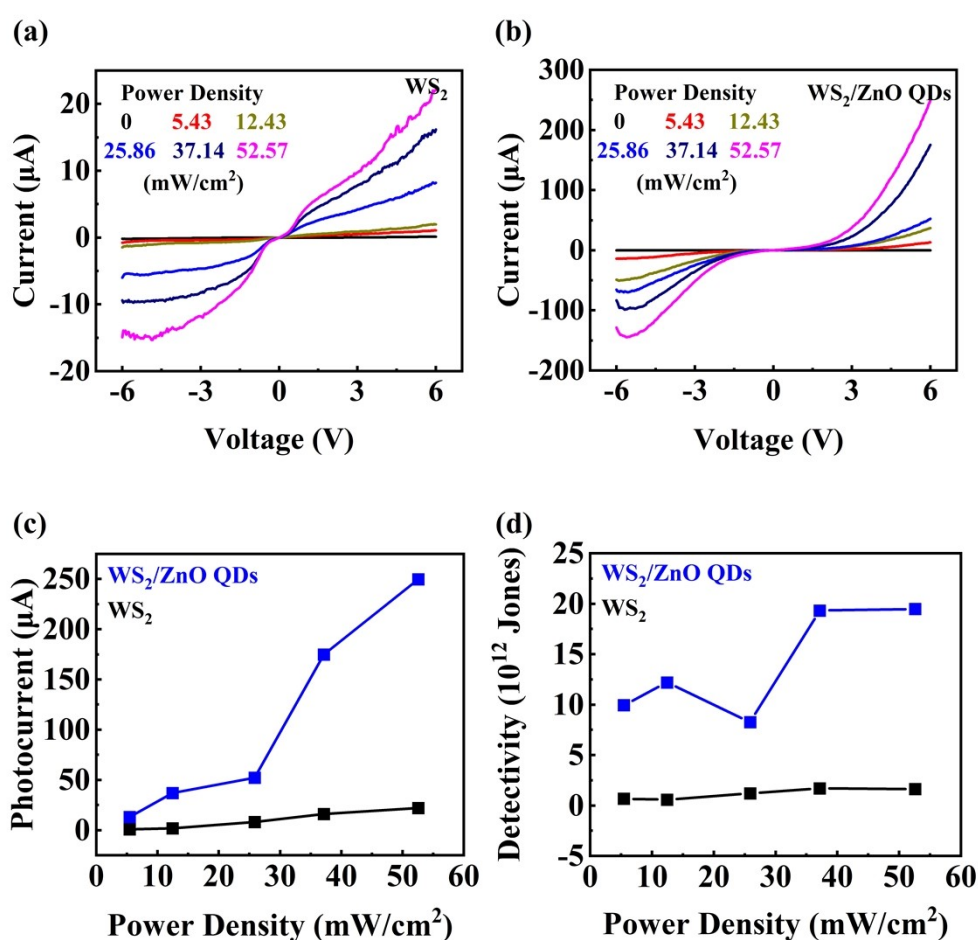

Figure S2. The I-V curves of WS<sub>2</sub> (a) and WS<sub>2</sub>/ZnO QDs (b) photodetectors under 325 nm laser irradiation with different optical power densities. The dependence of photocurrent (c) and detectivity (d) for WS<sub>2</sub> and WS<sub>2</sub>/ZnO QDs photodetectors under 325 nm laser irradiation with different optical power densities.

### 3. The energy band diagram of the WS<sub>2</sub>/Al<sub>2</sub>O<sub>3</sub>/ZnO QDs device.

Figure S3 shows the energy band diagram of the WS<sub>2</sub>/Al<sub>2</sub>O<sub>3</sub>/ZnO QDs device. To confirm the non-radiative energy transfer in the WS<sub>2</sub>/ZnO QDs heterojunction, we designed the WS<sub>2</sub>/Al<sub>2</sub>O<sub>3</sub>/ZnO QDs heterojunction. The wide bandgap Al<sub>2</sub>O<sub>3</sub> acts as a barrier to inhibit the charge transfer between WS<sub>2</sub> and ZnO QDs. The bandgap of Al<sub>2</sub>O<sub>3</sub> is much wider than that of monolayer WS<sub>2</sub> and ZnO QDs, which prevents charge transfer. As a result, the WS<sub>2</sub>/Al<sub>2</sub>O<sub>3</sub>/ZnO QDs device is only driven by non-radiative energy transfer.

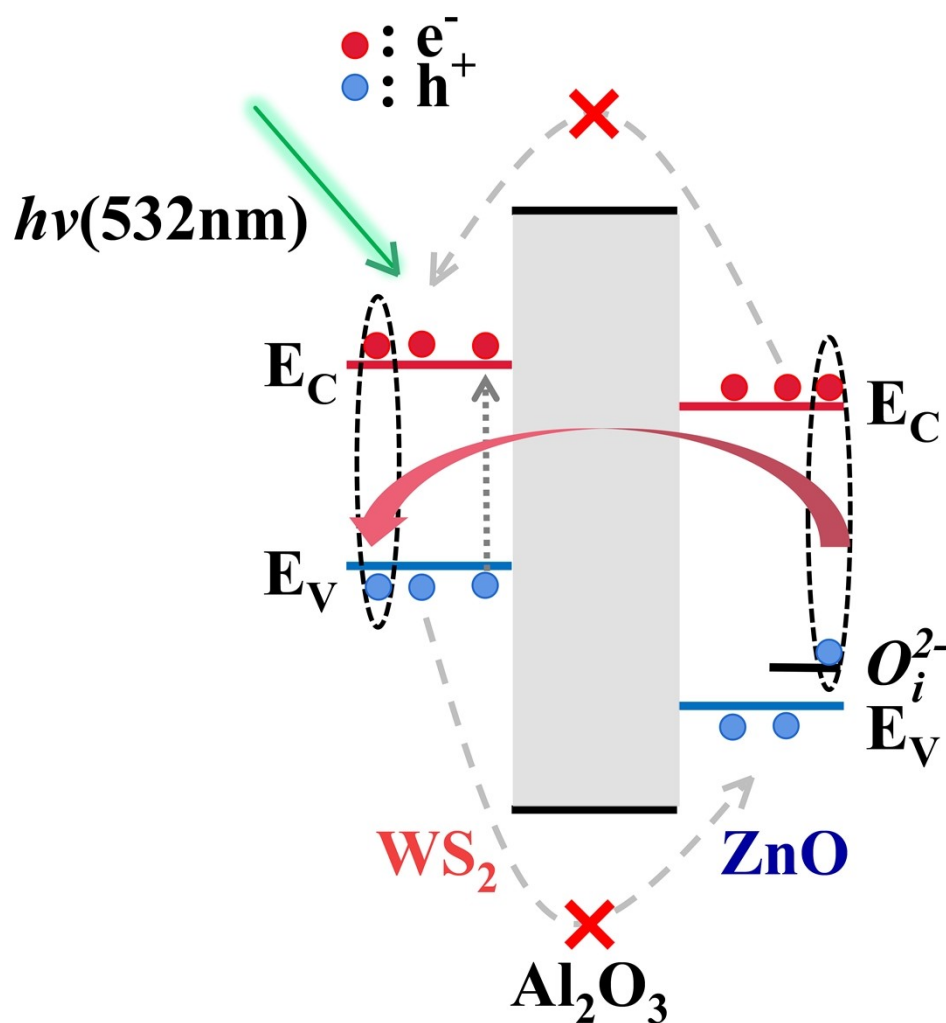

Figure S3. Energy band diagram of the WS<sub>2</sub>/Al<sub>2</sub>O<sub>3</sub>/ZnO QDs device.
